1

1

1 Nonadaptive Radiation: Pervasive diet specialization by drift in  
2 scale insects?

3

4

5 Nate B Hardy<sup>1</sup>, Daniel A Peterson<sup>2</sup>, Benjamin B Normark<sup>2</sup>

6

7 <sup>1</sup> Department of Entomology and Plant Pathology, 301 Funchess Hall, Auburn University,

8 Auburn, Alabama 36849.

9 <sup>2</sup> Department of Biology and Graduate Program in Organismic & Evolutionary Biology,

10 University of Massachusetts, Amherst, Massachusetts 01003.

11

12 Email: NBH (corresponding author): [n8@auburn.edu](mailto:n8@auburn.edu), DAP: [dapeters@cns.umass.edu](mailto:dapeters@cns.umass.edu), BBN:

13 [bnormark@bio.umass.edu](mailto:bnormark@bio.umass.edu)

14

15 Running head: Diet breadth drift in plant-feeding insects.

16 Keywords: insect-plant interactions, host range, niche breadth, diversification

17 Data archive: <http://dx.doi.org/10.5061/dryad.925cb>

18

19 **Abstract**

20 At least half of metazoan species are herbivorous insects. Why are they so diverse? Most  
21 herbivorous insects feed on few plant species, and adaptive host specialization is often invoked  
22 to explain their diversification. Nevertheless, it is possible that the narrow host ranges of many  
23 herbivorous insects are non-adaptive. Here, we test predictions of this hypothesis with  
24 comparative phylogenetic analyses of scale insects, a group for which there appears to be few  
25 host-use tradeoffs that would select against polyphagy, and for which passive wind-dispersal  
26 should make host specificity costly. We infer a strong positive relationship between host range  
27 and diversification rate, and a marked asymmetry in cladogenetic changes in diet breadth. These  
28 results are consonant with a system of pervasive non-adaptive host specialization in which small,  
29 drift- and extinction-prone populations are frequently isolated from persistent and polyphagous  
30 source populations. They also contrast with the negative relationship between diet breadth and  
31 taxonomic diversification that has been estimated in butterflies, a disparity which likely stems  
32 from differences in the average costs and benefits of host specificity and generalism in scale  
33 insects vs. butterflies. Our results indicate the potential for non-adaptive processes to be  
34 important to diet-breadth evolution and taxonomic diversification across herbivorous insects.

35

36

37 **Keywords**

38 Insect-plant interactions, speciation, extinction, comparative analysis

39

40

## 41 **Introduction**

42 Species richness is spread unevenly across the branches of the Tree of Life. What causes this  
43 unevenness? One factor might be what a species eats. Herbivory has evolved repeatedly among  
44 insects, and herbivorous insects tend to be more species-rich than their non-herbivorous relatives  
45 (Mitter et al. 1988; Wiens et al. 2015; but see Rainford and Mayhew 2015). In fact, herbivorous  
46 insects are more species-rich than any other group of metazoans (Futuyma and Agrawal 2009).  
47 Understanding what drives species diversification in herbivorous insects is tantamount to  
48 understanding most of species diversification. Host-plant associations are thought to be key  
49 (Ehrlich and Raven 1964; Futuyma and Moreno 1988; Futuyma and Agrawal 2009).

50

51 Herbivorous insects vary conspicuously in their diet breadth. Most are host-plant specialists, but  
52 frequency distributions of host ranges are right-skewed (e.g., Fig 1), and herbivorous insect  
53 communities invariably include a minority of broad-diet (polyphagous) species (Forister et al.  
54 2015). For the most part, we have assumed that host specialization is adaptive for herbivorous  
55 insects and we have incorporated this assumption into our explanations of herbivorous insect  
56 diversification (Ehrlich and Raven 1964). The Oscillation Hypothesis (Janz et al. 2006) is a good  
57 example. It explains herbivorous insect diversification as adaptive radiation (Yoder et al. 2010):  
58 an ecological opportunity decreases competition, relaxes stabilizing selection on host use, and  
59 causes the host range of a herbivorous insect species to expand. But host-range expansion is only  
60 temporary, because as competition rebounds, host-use trade-offs select against a broad diet and  
61 drive speciation through host specialization. Note that, in adaptive models, among-host  
62 performance trade-offs are essential; without them, there is no cost for polyphagy. But evidence

63 for these trade-offs has been hard to find. In fact, most studies have found instead that within  
64 herbivorous insect populations “general vigor” genotypes outperform others across all viable  
65 hosts (e.g., Forister et al. 2007; Agosta and Klemens 2009; Gompert et al. 2015). Host-use trade-  
66 offs are also called into question by the results of comparative phylogenetic analyses: in  
67 butterflies, host-use trade-offs do not select strongly enough against generalists so as to make  
68 broad diets evolutionarily ephemeral (Hardy and Otto 2014; Hamm and Fordyce 2015), and in  
69 armored scale insects host-use trade-offs do not constrain the phylogenetic history of host use  
70 (Peterson et al. 2015). This raises the possibility that much of the host specificity observed in  
71 herbivorous insects is not adaptive.

72

73 Instead, host specificity may evolve by genetic drift (Gompert et al. 2015). Small populations  
74 may become geographically cut off from polyphagous source populations. In these isolated  
75 groups, selection for adaptive polyphagy may not be strong enough to overcome the power of  
76 genetic drift, or selection for polyphagy may be relaxed if ancestral hosts are absent in restricted  
77 geographic ranges. We refer to this possibility as the specialization-by-drift hypothesis.

78 Regardless of how specialization comes about, it should increase the likelihood of extinction  
79 (Simpson 1953; Jablonski 1986). And if it evolves through genetic drift, it may be especially  
80 likely to reduce the potential for subsequent adaptive evolution, such as host switching or host  
81 range expansion (Jaenike 1990). Hence, the specialists produced by genetic drift can be thought  
82 of as evolutionary dead-ends. The idea of specialists as dead-ends is an old and conventional one  
83 in evolutionary biology (Cope 1896; Huxley 1942; Simpson 1953; Day et al. 2016);  
84 conventionally, specialists are thought to have a short-term advantage and long-term  
85 disadvantage. In the specialization-by-drift model they enjoy no advantage at all.

86

87 In short, the standard adaptive-specialization hypothesis views generalists as unstable and  
88 ephemeral, rather like radioactive isotopes that rapidly decay, whereas the specialization-by-drift  
89 hypothesis views generalists as stable and persistent, like a kind of phylogenetic meristem.  
90 Remarkably, although the reasons differ, the standard adaptive-specialization hypothesis and the  
91 specialization-by-drift hypothesis make many of the same predictions about the evolution of host  
92 range and its effects on species diversification. Both hypotheses predict that 1) host range  
93 evolution will be tightly linked to speciation events, 2) host ranges will shrink more than expand,  
94 and 3) generalists will speciate more rapidly than specialists.

95

96 To reiterate, in the standard version of the adaptive-specialization hypothesis, a rare ecological  
97 opportunity causes the host range of a herbivorous insect species to expand. But before long,  
98 escalating competition renders the performance trade-offs that are inherent to polyphagy  
99 untenable, and the generalist rapidly decays into an array of specialist descendants. The adaptive-  
100 specialization hypothesis doesn't rule out the possibility that specialists can speciate. But it does  
101 imply that speciation rates are much faster in generalists, and that speciation-via-specialization is  
102 the norm. On the other hand, in specialization-by-drift, generalist species stay generalist. But  
103 because a generalist species is so widespread and flexible, there is a good chance that small  
104 populations will become isolated somewhere along or beyond the edge of its geographic range. If  
105 such a population is isolated for long enough, the evolution of reproductive isolation is likely,  
106 and the evolution of host specificity may result from genetic drift and relaxed selection for  
107 polyphagy. If environments change for these specialist species, and select for broader host  
108 ranges, this selection will be inefficient, as it will be opposed by strong genetic drift, and some of  
109 the genetic underpinnings of phenotypic plasticity will have decayed. Host specificity is a dead  
110 end. Here we are contrasting one standard adaptive model with one plausible nonadaptive model;

111 a range of other adaptive and non-adaptive hypotheses about host range are of course possible --  
112 see Discussion.

113

114 The specialization-by-drift and standard adaptive-specialization hypotheses do make some  
115 distinct and testable predictions about the phylogenetic evolution of host range. Specialization-  
116 by-drift predicts that broad host ranges will persist over evolutionary time scales; that is, host  
117 range will have a strong phylogenetic signal. By contrast, the adaptive-specialization hypothesis  
118 predicts that broad host ranges will be ephemeral, as host-use tradeoffs select against generalist  
119 phenotypes and hosts are rapidly apportioned among specialist daughter lineages. Specialization-  
120 by-drift also predicts that most cladogenetic change in host range will be asymmetrical. One of  
121 the daughter lineages produced by speciation of a polyphagous ancestor will be a host-specialist.  
122 The other will retain the host range of the ancestral population. On the other hand, standard  
123 adaptive-specialization predicts more symmetry in cladogenetic range reductions.

124

125 Comparative phylogenetic analyses of butterflies do not support the standard adaptive-  
126 specialization hypothesis: species diversification rates appear higher in specialists, host range  
127 size infrequently changes during speciation events, and when it does, expansion is as likely as  
128 contraction (Hardy and Otto 2014). Furthermore, as noted previously, polyphagy is  
129 phylogenetically conservative, at least at the level of butterfly genera (Hamm and Fordyce 2015;  
130 but see Nylin et al. 2014). Here, we estimate how host range affects species diversification in  
131 scale insects, a group for which we expect specialization-by-drift to be especially likely. Our  
132 expectation is based on three considerations: 1) Comparative phylogenetic analyses indicate a  
133 lack of evolutionary tradeoffs in host use that would select against generalist phenotypes in scale  
134 insects (Peterson et al. 2015), that is, polyphagy is cheap. 2) Scale insects have sessile adult

135 females and disperse passively, by wind, as delicate first instar nymphs that can not survive for  
136 long away from a host. Thus, in scale insects, host specialization may be especially costly, due  
137 to high mortality during dispersal (Dixon et al. 1987). 3) Polyphagous scale insect species can  
138 have exceptionally broad host ranges, geographic ranges, and population sizes (García Morales  
139 et al. 2016; Ross et al. 2013). These are species that would seem to have an exceptionally low  
140 probability of going extinct, and a high probability of giving rise to isolated offshoots.

141

## 142 **Methods**

143 Statistical tests were performed in the R software environment (R core development team 2015)  
144 on the comparative phylogenetic dataset of Hardy et al. (2015). The data are in the Dryad archive  
145 (<http://dx.doi.org/10.5061/dryad.925cb>). They consist of a time-calibrated, multi-locus estimate  
146 of phylogeny for 472 scale insect species, along with host range estimates for 426 of the species  
147 in the phylogeny. Hardy et al. (2015) quantified host ranges as counts of host plant families and  
148 as phylogenetic diversities (PD) of host genera.

149

150 Here, we estimated the effect of host range on taxonomic diversification rates by fitting  
151 Quantitative-state Speciation and Extinction (QuaSSE) models (FitzJohn 2010). Specifically, we  
152 compared a model in which speciation rate was a linear function of host range to a model in  
153 which speciation rate was constant and independent of host range. In both models, constant  
154 extinction rates were estimated. SSE model comparisons based on empirical phylogenies are  
155 prone to elevated Type I error rates (Madisson and FitzJohn 2014; Rabosky and Goldberg 2015).  
156 To address this issue, we used a simulation approach to adjust significance thresholds, following  
157 the recommendation of Rabosky and Goldberg (2015). Specifically, we constructed a set of 100

158 null datasets by simulating the evolution of a diversification-rate-neutral trait over the scale  
159 insect phylogeny, using a Brownian Motion model with the value of the  $\sigma^2$  parameter estimated  
160 from the empirical data. Then, for each simulated dataset, we calculated the difference between  
161 AIC scores ( $\delta$ -AIC) of a constant- and linear-speciation-rate QuaSSE model. Lastly, we  
162 determined the significance of the empirical  $\delta$ -AIC through comparison to the null distribution of  
163 simulated  $\delta$ -AICs.

164

165 To assess the frequency and symmetry of cladogenetic changes in host range, we transformed the  
166 host range data to a binary trait by coding species that feed on hosts in one plant family as  
167 monophagous, and species that feed on two or more host plant families as polyphagous. Then we  
168 compared the fit of four Binary State Speciation and Extinction node-enhanced state shift  
169 (BiSSE-ness: Magnuson-Ford and Otto 2012) models: 1) a model in which there was only  
170 anagenetic evolution of host range size (this has six free parameters and is equivalent to the  
171 standard BiSSE model), 2) a model in which there is only cladogenetic evolution of host range,  
172 and the rates and symmetry of host range evolution depend on range size (this has eight free  
173 parameters), 3) a cladogenetic model in which the proportion of asymmetrical host range  
174 evolution in monophagous ancestors (i.e., the  $p0a$  parameter) was set to 0.5 (seven free  
175 parameters), and 4) a cladogenetic model in which in which the proportion of asymmetrical host  
176 range evolution in polyphagous ancestors ( $p1a$ ) was set to 0.5. Full model specifications are  
177 available in the R scripts in Supplementary Materials. The significance of model comparisons  
178 was evaluated using simulation, as for the QuaSSE analyses, except with different models of  
179 neutral trait evolution. For the comparison between the anagenetic and full cladogenetic models,  
180 we used a mk2 model of discrete trait evolution to simulate neutral trait histories. For the



181 comparisons between the full and constrained cladogenetic models, we evolved traits under an  
182 mk2 model over a version of the scale insect phylogeny in which all branch lengths were set to 1.  
183 Transforming branch lengths in this way approximates a history of cladogenetic (i.e., punctuated)  
184 evolution (Pagel 1994). We fit all SSE models using maximum likelihood optimization in the  
185 diversitree package (FitzJohn 2012). We also performed a Bayesian search to get an additional  
186 sense of the error of the linear-speciation-rate QuaSSE model coefficient estimates. We ran an  
187 MCMC analysis for 1000 steps, using the ML parameter estimates as starting values, and an  
188 exponential prior with rate 10. The first 100 steps were discarded as burn-in. We used Geweke's  
189 convergence diagnostic to confirm that the remaining 900 samples were from the stationary  
190 distribution (Geweke 1992; Plummer et al. 2006).

191

192 To visualize the evolution of host range over the scale insect phylogeny, we performed an  
193 ancestral state reconstruction under the estimated parameters of a BiSSE model. Lastly, we  
194 estimated the phylogenetic signal of host range using Abouheif's test (Abouheif 1999) and  
195 orthonormal decomposition (Ollier et al. 2006), implemented in the R package adephylo  
196 (Jombart et al. 2010).

## 197 **Results**

198 We found a positive relationship between host range and diversification rate, regardless of how  
199 host range was measured, or what estimation procedure was used (Fig 1). The linear speciation  
200 model fit the data better than the constant speciation model (host family counts  $\delta$ -AIC = 42.3, p-  
201 value = 0.02; PD  $\delta$ -AIC = 49.7, p-value < 0.01), and had a positive slope (Table S1).  
202 Interestingly, in the PD parameterization, the speciation rate estimates for the most host specific  
203 species were lower than the estimated extinction rate. We also found that the evolution of host

204 range size is largely cladogenetic and strongly asymmetrical. The binary-state model with only  
205 cladogenetic evolution of host range was strongly preferred to a model with only anagenetic host  
206 range evolution ( $\delta$ -AIC = 14.8, p-value < 0.01). Moreover, in the cladogenetic model, the  
207 proportion of asymmetrical host range changes in speciation events involving polyphagous  
208 ancestors was close to unity (Table S1). The full cladogenetic model was a significantly better fit  
209 to the data than a model in which cladogenetic changes in polyphagous ancestors were  
210 constrained to be symmetrical ( $\delta$ -AIC = 10.5, p-value < 0.01). By contrast, constraining  
211 monophagous ancestors to be involved in only symmetrical cladogenetic changes in host range  
212 did not significantly reduce the likelihood of the model at the 0.5 level ( $\delta$ -AIC = 1.7, p-value =  
213 0.07). Note that in the best-fitting binary-state model, the full cladogenetic model, speciation  
214 rates are actually faster in specialist lineages, but so are extinction rates, and as a result, net  
215 diversification rates are an order of magnitude higher in generalists (Table S1).

216

217 We recovered strong phylogenetic signal for host range (Abouheif's test, Dmax and SCE statistic  
218 p-values each < 0.01), although we should point out that those tests assume that host range  
219 evolves under Brownian Motion and does not affect taxonomic diversification. The phylogenetic  
220 conservatism of polyphagy is striking in the BiSSE reconstruction of ancestral host ranges (Fig  
221 2.)

## 222 **Discussion**

223 In this study, we find support for two predictions of the standard adaptive-specialization  
224 hypothesis: 1) a positive relationship between host range and species diversification rate, and 2)  
225 a high proportion of cladogenetic host range reduction. This constitutes the first support for those  
226 predictions, and contrasts with the case of butterflies, which display a negative effect of host

227 range size on diversification rate, and a low proportion of cladogenetic host range evolution  
228 (Hardy and Otto 2014). However, both of these predictions are also consistent with the  
229 specialization-by-drift hypothesis, and for scale insects, we expect specialization-by-drift to be  
230 more likely. Indeed, we recover two further patterns that are consistent with specialization-by-  
231 drift but not with the standard adaptive-specialization hypothesis: 3) asymmetry of cladogenetic  
232 host range reductions, with specialization occurring in only one of the pair of daughter species,  
233 and 4) a strong phylogenetic signal for host range, with polyphagy persisting over evolutionary  
234 time. Nevertheless, the phylogenetic patterns of host-use evolution do not tell us anything  
235 directly about the short-term adaptiveness of host specificity in scale insects, and could be  
236 explained by alternative hypotheses.

237

238 One such alternative is the serial-specialization hypothesis, first applied to parasitic tachinid flies  
239 (Stireman 2005). The starting premise is that, depending on the circumstances, selection may  
240 push for small host ranges or large ones. Examples of factors that could determine optimal host  
241 ranges for herbivorous insects include the stability of plant communities (Jaenike 1990) and the  
242 dispersal ability of the herbivores (Hardy et al. 2015). The serial-specialization hypothesis builds  
243 on that premise with two additional assumptions. First, generalists are less likely to go extinct.  
244 This is the flip side of the specialization as a dead-end hypothesis, and is supported by the fossil  
245 record and comparative phylogenetics (e.g., Jablonski 1987, Hardy and Otto 2014). Second,  
246 selection on local populations of a generalist species will often promote the evolution of host  
247 specificity and reproductive isolation. The concept of an immortal generalist species that buds  
248 off specialist daughter species is obviously something that serial-specialization shares with  
249 specialization-by-drift. And this means that phylogenetic patterns of host range evolution that we

250 estimated for scale insects are equally compatible with serial-specialization. How do we tell them  
251 apart?

252

253 Based on what else we know about scale insect biology, we think that specialization-by-drift is  
254 the more likely explanation. Specifically, in scale insects it looks like broad diets are cheap  
255 (Peterson et al. 2015), and narrow diets are expensive, owing to the mortality they are likely to  
256 cause during dispersal. But we cannot rule out the serial version of adaptive specialization;  
257 indeed, serial adaptive specialization may be highly plausible in some circumstances. The cost of  
258 host specificity in scale insects undoubtedly depends on the ecological and population genetic  
259 context (Hardy et al. 2015). For example, the costs of wind dispersal should be much lower in  
260 environments low plant species richness, or in which one plant species is extremely abundant. In  
261 fact, many specialist species of scale insects do maintain large populations on ecologically  
262 dominant hosts such as grasses and pines (García Morales et al. 2016). On the other hand, most  
263 specialist scale insect species occur in more diverse biomes and on less abundant hosts (García  
264 Morales et al. 2016). Which again points to more specialization by drift than by serial adaptation.  
265 But a glance at the phylogenetic distribution of host ranges in Figure 2 suggests that processes  
266 other than strict specialization by drift. Under the most extreme form of the specialization-by-  
267 drift hypothesis, one supreme generalist would be the progenitor of all other species, all of them  
268 specialists. In that case, barring some hard polytomies, the scale insect phylogeny would be  
269 completely unbalanced, and the generalist would be sister to its most recent offshoot (Stireman  
270 2005). That's not what Figure 2 looks like.

271

272 For other insects, especially insects with more efficient dispersal modes, host specialization by  
273 drift may be less likely. For example, in butterflies, the vagility, longevity and complex sensory

274 systems of adult females may dramatically lower costs for host-plant specialization, and could  
275 open the door to more adaptive specificity. On the other hand, the costs of polyphagy are as  
276 unclear for butterflies as they are for scale insects, and that leaves the door open for non-adaptive  
277 specificity. Butterfly life history may also serve to make specialization-by-drift harder to detect;  
278 it may be more likely that specialization by drift is followed by adaptive niche transformation  
279 and expansion, a process that would be consistent with the symmetrical evolutionary changes in  
280 host range estimated by Hardy and Otto (2014). But the most likely candidates for specialization-  
281 by-drift are other groups for which specificity is especially costly; that is, groups with low-  
282 mobility adult females and haphazard dispersal such as root-feeding weevils (Curculionidae:  
283 Entiminae), stick insects (Phasmatodea), and bagworm moths (Psychidae) (Normark and  
284 Johnson 2011).

285

286 In our description of specialization-by-drift we assumed an allopatric mode for speciation.  
287 Alternative non-adaptive modes of speciation, such as conflictual speciation (Crespi and Nosil,  
288 2013), might also be relevant. This is especially true for scale insects, which engage in obligate  
289 endosymbioses that are expected to increase the potential for genetic conflict (Brucker and  
290 Bordenstein 2012). However, unless strong barriers to hybridization are initially present, genes  
291 involved in conflicts between scale insects and their endosymbionts might actually homogenize  
292 gene pools, and forestall speciation (Crespi and Nosil 2013). Which mean that genetic conflicts  
293 probably play a more important role in crystallizing the genetic divergences which occurred in  
294 allopatry, than in driving sympatric speciation.

295

296 Our results imply that, for most scale insects, ecological specificity is a dead-end. The evidence  
297 is mixed for ecological specificity being a dead-end in other lineages (Jablonski 2008; Day et al.

298 2016). This is not surprising, given the dissonance in the theory for how specificity should affect  
299 macroevolution. On the one hand, we have the dead-end. On the other, the master of a trade. As  
300 Jablonski (2008) points out in his excellent review of species selection, most of the traits that we  
301 expect to increase the risk of extinction should also increase the chance of speciation. Ecological  
302 specificity falls into this category. Furthermore, if specialization increases competitive ability, it  
303 might actually decrease the risk of extinction (Roberts and Hawkins 1999; Stireman 2005). The  
304 net effect that it has on species diversification should depend on the relative costs of big niches  
305 (e.g., inefficient metabolism) and small niches (e.g., smaller, patchier resources), which should  
306 vary among species, depending on factors such as dispersal mode and environmental  
307 heterogeneity.

308

309 Our results are contingent on the parameters that were included in the models of trait-dependent  
310 diversification and on the assumptions made by those models. Host range *per se* cannot be the  
311 most proximate factor affecting speciation and extinction dynamics. Rather, host range should  
312 affect diversification by influencing population genetic parameters like population size and  
313 structure, by playing a role in structuring the selective environment, and by affecting the  
314 probability of colonizing new hosts and new places (Jahner et al. 2011; Slove and Janz 2011). In  
315 this study we fail to reject the hypothesis that host specialization is caused by genetic drift in  
316 scale insects. Further research is needed to test other aspects of that hypothesis, for example  
317 comparative assessments of population size and structure in generalist and specialist species, and  
318 experiments designed to assess the extent of drift, or the strength of selection at loci important  
319 for host use and across the genome.

320 **Conclusions**

321 Most herbivorous insect species are host-plant specialists. The idea that a specialist on its own  
322 host should be able to outperform generalists is intuitively appealing, but it fails to account for  
323 how host specificity may alter population genetic factors and the efficiency of natural selection.  
324 It also fails to align with the ever-expanding body of research that indicates the superior  
325 performance of generalists, and fails to predict the distribution of host range across herbivorous  
326 insect phylogenies (e.g., Hardy & Otto 2014, Peterson et al. 2015). Here we find patterns of host  
327 range evolution that are consistent with a model of specialization by drift. Population genetic  
328 processes other than natural selection should be more fully and more routinely incorporated into  
329 ideas about the species diversification of the most species-rich metazoans.

330

331 **Acknowledgments**

332 Our collaboration was fostered by travel funds provided by NSF (DEB-1258001 and EF-  
333 1115191). Further support for this research was provided by the Alabama Agricultural  
334 Experiment Station to NBH. This manuscript was greatly improved by the insightful comments  
335 of the editors and anonymous reviewers. We are grateful for their help.

336 **References**

Abouheif, E. 1999. A method for testing the assumption of phylogenetic independence in comparative data. *Evol. Ecol. Res.* 1:895–909.

Agosta, S. J., and J. A. Klemens. 2009. Resource specialization in a phytophagous insect: no evidence for genetically based performance trade-offs across hosts in the field or laboratory. *J. Evol. Biol.* 22:907–912.

Brucker, R.M. and S. R. Bordenstein. 2012. Speciation by symbiosis. *Trends Ecol. Evol.* 27: 443–451.

Cope, E. D. 1896. *The primary factors of organic evolution*. Open Court Publishing CO., Chicago.

Crespi, B. and P. Nosil. 2013. Conflictual speciation: species formation via genomic conflict. *Trends Ecol. Evol.* 28: 48–57.

Day, E. H., X. Hua and L. Bromham. 2016. Is specialization an evolutionary dead end? Testing for differences in speciation, extinction and trait transition rates across diverse phylogenies of specialist and generalists. *J. Evol. Bio.* DOI: 10.1111/jeb.12867

Dixon, A. F. G., P. Kindlmann, J. Lepš, and J. Holman. 1987. Why there are so few species of aphids, especially in the tropics. *Am. Nat.* 129:580–592.

Ehrlich, P. R., and P. H. Raven. 1964. Butterflies and plants: a study in coevolution. *Evolution* 586–608.

FitzJohn, R. G. 2012. Diversitree: comparative phylogenetic analyses of diversification in R. *Methods Ecol. Evol.* 3:1084–1092.

FitzJohn, R. G. 2010. Quantitative traits and diversification. *Syst. Biol.* 59:619–633.

Forister, M. L., A. G. Ehmer and D. J. Futuyma. 2007. The genetic architecture of a niche: variation and covariation in host use traits in the Colorado potato beetle. *J. Evol. Bio.* 20:985–996.



Forister, M. L., V. Novotny., A. K. Panorska, L. Baje, Y. Basset, P. T. Butterill, L. Cizek, P. D.

Coley, F. Dem, I. R. Diniz and P. Drozd. 2015. The global distribution of diet breadth in insect herbivores. *Proc. Natl. Acad. Sci.* 112:442–447.

Futuyma, D. J., and A. A. Agrawal. 2009. Macroevolution and the biological diversity of plants and herbivores. *Proc. Natl. Acad. Sci.* 106:18054–18061.

Futuyma, D. J., and G. Moreno. 1988. The evolution of ecological specialization. *Annu. Rev. Ecol. Syst.* 19:207–233.

García Morales, M., B. D. Denno, D. R. Miller, G. L. Miller, Y. Ben-Dov and N. B. Hardy. 2016. ScaleNet: a literature-based model of scale insect biology and systematics. *Database* 2016:bav118, doi: 10.1093/database/bav118

Geweke, J. Evaluating the accuracy of sampling-based approaches to calculating posterior moments. In *Bayesian Statistics 4* (ed JM Bernardo, JO Berger, AP Dawid and AFM Smith). Clarendon Press, Oxford, UK.

Gompert, Z., J. P. Jahner, C. F. Scholl, J. S. Wilson, L. K. Lucas, V. Soria-Carrasco, J. A.

Fordyce, C. C. Nice, C. A. Buerkle, and M. L. Forister. 2015. The evolution of novel host use is unlikely to be constrained by tradeoffs or a lack of genetic variation. *Mol. Ecol.* 24:2777–2793.

Hamm, C. A., and J. A. Fordyce. 2015. Patterns of host plant utilization and diversification in the brush-footed butterflies. *Evolution* 69:589–601.

Hardy, N. B. and L. G. Cook. 2010. Gall-induction in insects: evolutionary dead-end or speciation driver? *BMC Evol. Bio.* 10:257; DOI: 10.1186/1471-2148-10-257

Hardy, N. B., and S. P. Otto. 2014. Specialization and generalization in the diversification of phytophagous insects: tests of the musical chairs and oscillation hypotheses. *Proc. R. Soc. B Biol. Sci.* 281:20132960.

Hardy, N. B., D. A. Peterson and B. B. Normark. 2015. Scale insect host ranges are broader in the tropics. *Bio. Let.* 11: 20150924; DOI: 10.1098/rsbl.2015.0924

Huxley, J. 1942. *Evolution: the modern synthesis*. George Allen and Unwin, London.

Jaenike, J. 1990. Host specialization in phytophagous insects. *An. Rev. Ecol. Sys.* 21: 243–273.

Jablonski, D. 1986. Background and mass extinctions: The alteration of macroevolutionary regimes. *Science* 231: 129–133.

Jablonski, D. 2008. Species selection: Theory and Data. *Annu. Rev. Ecol. Evol. Syst.* 39: 501–524.

Jahner, J. P., M. M. Bonilla, K. J. Badik, A. M. Shapiro and M. L. Forister 2011. Use of exotic hosts by Lepidoptera: widespread species colonize more novel hosts. *Evolution* 65: 2719–2724.

Janz, N., S. Nylin, and N. Wahlberg. 2006. Diversity begets diversity: host expansions and the diversification of plant-feeding insects. *BMC Evol. Biol.* 6:4.

Jombart, T., F. Balloux, and S. Dray. 2010. adephylo: new tools for investigating the phylogenetic signal in biological traits. *Bioinformatics* 26:1907–1909.

Kelley S. T., and B. D. Farrell. 1998. Is specialization a dead end? The phylogeny of host use in *Dendroctonus* bark beetles (Scolytidae). *Evolution* 52:1731–1743.

Maddison, W. P., and R. G. FitzJohn. 2015. The Unsolved Challenge to Phylogenetic Correlation Tests for Categorical Characters. *Syst. Biol.* 64:127–136.

Magnuson-Ford, K., and S. P. Otto. 2012. Linking the investigations of character evolution and species diversification. *Am. Nat.* 180:225–245.

Mitter, C., B. Farrell, and B. Wiegmann. 1988. The Phylogenetic Study of Adaptive Zones: Has Phytophagy Promoted Insect Diversification? *Am. Nat.* 132:107–128.

Normark, B. B., and N. A. Johnson. 2011. Niche explosion. *Genetica* 139:551–564.

Nylin, S., J. Slove and N. Janz. 2014. Host plant utilization, host range oscillations and diversification in nymphalid butterflies: a phylogenetic investigation. *Evolution* 68:105–124.

Ollier, S., P. Couteron, and D. Chessel. 2006. Orthonormal Transform to Decompose the Variance of a Life-History Trait across a Phylogenetic Tree. *Biometrics* 62:471–477.

Pagel, M. 1994. Detecting correlated evolution on phylogenies: a general method for the comparative analysis of discrete characters. *Proc. R. Soc. Lond. B.* 255:37–45.

Peterson, D. A., N. B. Hardy, G. E. Morse, I. C. Stocks, A. Okusu, and B. B. Normark. 2015. Phylogenetic analysis reveals positive correlations between adaptations to diverse hosts in a group of pathogen-like herbivores. *Evolution* 69:2785–2792.

Plummer, M., N. Best, K. Cowles and K. Vines. 2006. CODA: Convergence diagnosis and output analysis for MCMC. *R news* 6:7–11.

Rabosky, D. L., and E. E. Goldberg. 2015. Model Inadequacy and Mistaken Inferences of Trait-Dependent Speciation. *Syst. Biol.* Syu131.

Rainford, J.L. and Mayhew, P.J., 2015. Diet evolution and clade richness in Hexapoda: a phylogenetic study of higher taxa. *Am. Nat.* 186:777–791.

Roberts, C. M. and J. P. Hawkins. 1999. Extinction risk in the sea. *Trends Ecol. Evol.* 14: 241–246.

Simpson, G. 1953. *The major features of evolution.* Colombia Univ. Press, New York.

Slove, J., and N. Janz. 2011. The relationship between diet breadth and geographic range size in the butterfly subfamily Nymphalinae—a study of global scale. *PLoS ONE* 6:e16057.

Stireman, J. O. 2005. The evolution of generalization? Parasitoid flies and the perils of inferring host range evolution from phylogenies. *J. Evol. Bio.* 18: 325–336.

Wiens, J. J., Lapoint, R. T. and Whiteman, N.K. 2015. Herbivory increases diversification across insect clades. *Nature communications* 6:8370, DOI: 10.1038/ncomms9370.

Yoder, J.B., E. Clancey, S. Des Roches, J. M. Eastman, L. Gentry, W. Godsoe, T. J. Hagey, D.

Jochimsen, B. P. Oswald, J. Robertson and B. A. J. Sarver. 2010. Ecological opportunity and the origin of adaptive radiations. *J. Evol. Bio.* 23: 1581–1596.

337 **Figure 1.** Speciation rate estimated as a function of host plant range (number of host families).  
338 The number of host families used by each of the 426 scale insect species examined is shown as a  
339 histogram. The solid black line shows the Bayesian estimate of the mean relationship between  
340 host range and speciation under a QuaSSE model (speciation rate =  $0.095 + 0.050 * \text{host range}$ ).  
341 The dashed gray lines show the 95% High Posterior Density.

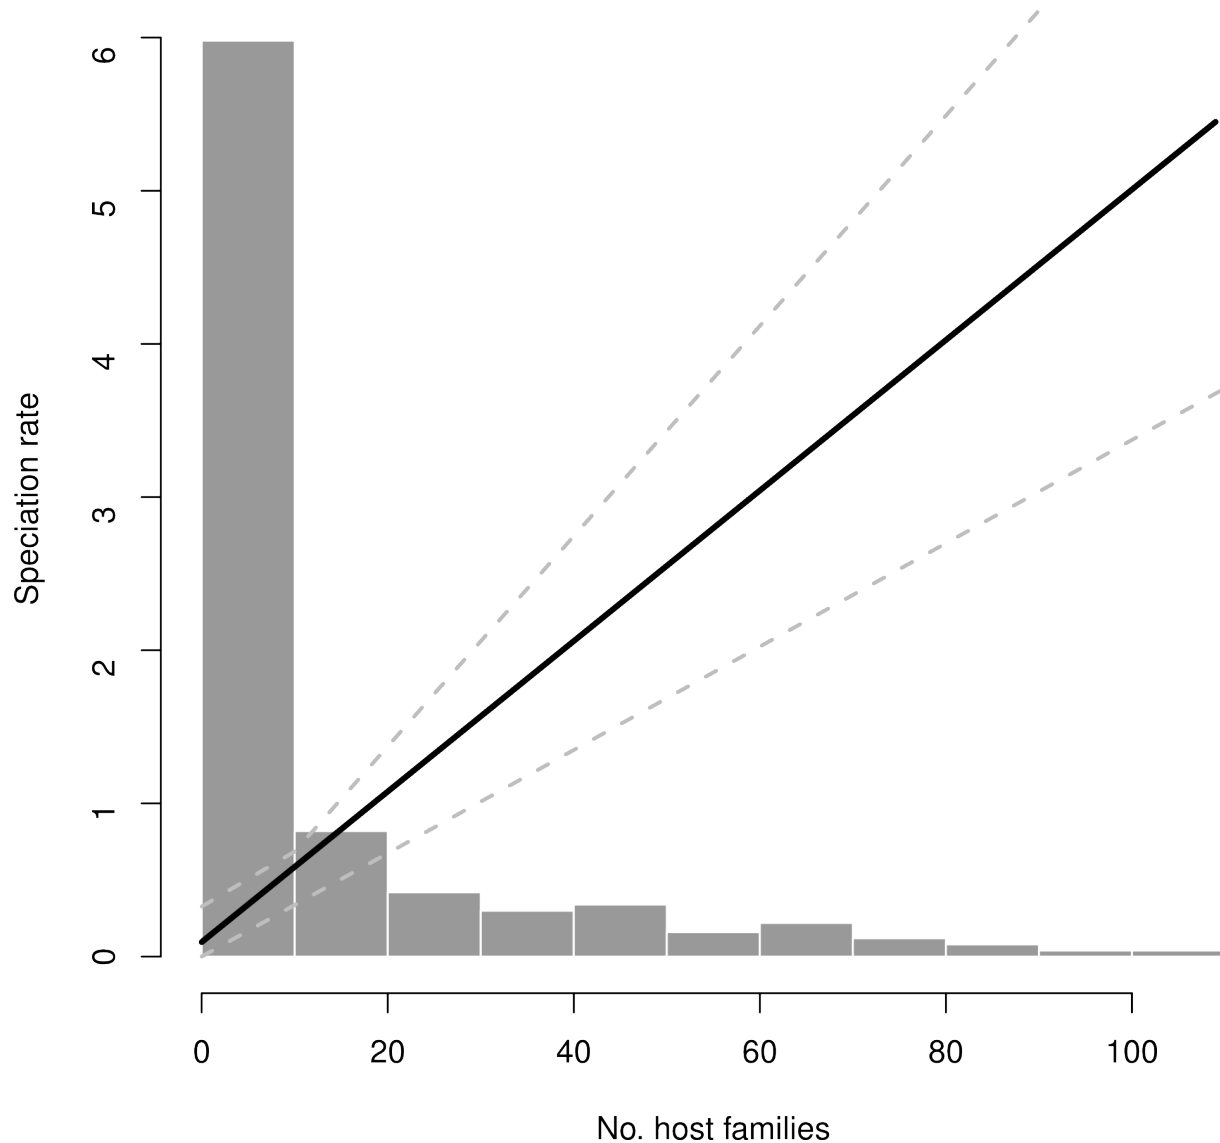

343

344

345 **Figure 2.** Marginal ancestral state reconstructions under the estimated BiSSE model parameters.

346 Pie charts show proportional likelihoods at internodes. Gray: monophagy (one host plant family),

347 Green: polyphagy (multiple host plant families).

348

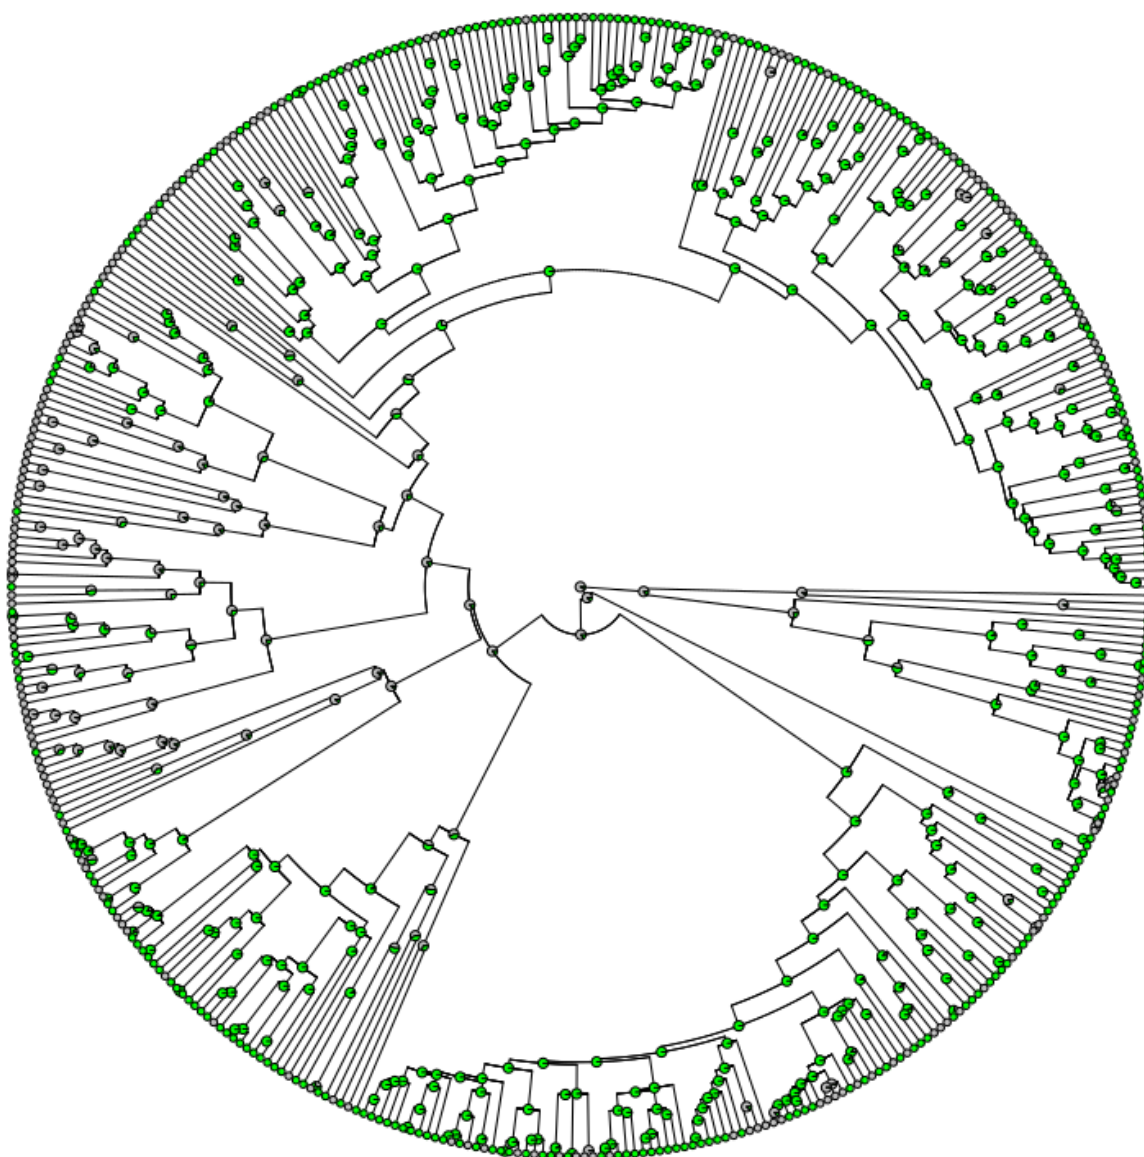

Source: http://www.biorxiv.org/content/10.1101/064220v1.full.pdf
